# Supplementary material for: Valorization Potentials of Rapeseed Meal in a Biorefinery Perspective: Focus on Nutritional and Bioactive Components
Source: MDPI journal article supplement (doi:10.3390/molecules26226787), 2021-11-10
Supplement: s1 [file s1]

# Supplementary information

## Valorisation potentials of rapeseed meal in a biorefinery perspective: focus on nutritional and bioactive components

**Gabriella Di Lena <sup>1,\*</sup>, Jose Sanchez del Pulgar <sup>1</sup>, Massimo Lucarini <sup>1</sup>, Alessandra Durazzo <sup>1</sup>, Petra Ondrejíčková <sup>2</sup>, Florin Oancea <sup>3</sup>, Rodica-Mihaela Frincu <sup>3</sup>, Altero Aguzzi <sup>1</sup>, Stefano Ferrari Nicoli <sup>1</sup>, Irene Casini <sup>1</sup>, Paolo Gabrielli <sup>1</sup>, Roberto Caproni <sup>1</sup>, Igor Červený <sup>4</sup>, and Ginevra Lombardi-Boccia <sup>1</sup>**

<sup>1</sup> CREA Research Centre for Food and Nutrition, Via Ardeatina 546, 00178 Rome, Italy;

jsapuri@hotmail.com (J.S.d.P.); massimo.lucarini@crea.gov.it (M.L.); alessandra.durazzo@crea.gov.it (A.D.); altero.aguzzi@crea.gov.it (A.A.), stefano.nicoli@crea.gov.it (S.F.N.), irene.casini@crea.gov.it (I.C.), paolo.gabrielli@crea.gov.it (P.G.), roberto.caproni@crea.gov.it (R.C.), g.lombardiboccia@crea.gov.it (G.L.B.)

<sup>2</sup> ENVIRAL a.s., Trnavská cesta, 920 41 Leopoldov, Slovak Republic; Ondrejickova@enviengroup.eu (P.O.)

<sup>3</sup> National Institute for Research and Development in Chemistry and Petrochemistry – ICECHIM, Bucharest; florin.oancea@icechim.ro (F.O.), icechim.calarasi@gmail.com (M.F.)

<sup>4</sup> Poľnoservis a.s., Trnavská cesta, 920 41 Leopoldov, Slovak Republic; cerven@polnoservis.sk (I.Č.)

\* Correspondence: gabriella.dilena@crea.gov.it; Tel.: +39-06-51494501

**Table S1.** Sampling date at Pol'noservis's plants of the different rapeseed meal lots analysed in this study.

| RAPESEED MEAL |               |
|---------------|---------------|
| LOT           | Sampling date |
| 1             | 2/7/2018      |
| 2             | 22/10/2018    |
| 3             | 23/11/2018    |
| 4             | 21/1/2019     |
| 5             | 25/2/2019     |
| 6             | 23/4/2019     |
| 7             | 30/5/2019     |
| 8             | 18/6/2019     |
| 9             | 29/7/2019     |
| 10            | 26/9/2019     |

**Table S2.** Ionization and detection parameters of phenolic compounds.

| Compound Name          | Prec. Ion | Prod. Ion | Frag. | CE | Cell Volt | Polarity |
|------------------------|-----------|-----------|-------|----|-----------|----------|
| Gallic acid            | 169.1     | 125       | 80    | 9  | 7         | Negative |
|                        | 169.1     | 79        | 80    | 21 | 7         | Negative |
| Protocatechuic acid    | 153.1     | 109       | 80    | 13 | 7         | Negative |
|                        | 153.1     | 108       | 80    | 25 | 7         | Negative |
| 4-Hydroxybenzoic acid  | 137.1     | 93        | 80    | 13 | 7         | Negative |
|                        | 137.1     | 65        | 80    | 33 | 7         | Negative |
| Neochlorogenic acid    | 353.3     | 191       | 110   | 13 | 7         | Negative |
|                        | 353.3     | 179       | 110   | 13 | 7         | Negative |
| Vanillic Acid          | 167.1     | 151.9     | 80    | 5  | 7         | Negative |
|                        | 167.1     | 108       | 80    | 17 | 7         | Negative |
| Chlorogenic acid       | 353.3     | 191       | 80    | 9  | 7         | Negative |
|                        | 353.3     | 85        | 80    | 45 | 7         | Negative |
| Caffeic acid           | 179.2     | 135       | 80    | 13 | 7         | Negative |
|                        | 179.2     | 134.2     | 80    | 25 | 7         | Negative |
| Syringic acid          | 197.2     | 182       | 80    | 9  | 7         | Negative |
|                        | 197.2     | 123       | 80    | 21 | 7         | Negative |
| Cryptochlorogenic acid | 353.3     | 179       | 110   | 13 | 7         | Negative |
|                        | 353.3     | 173       | 110   | 13 | 7         | Negative |
| p-Coumaric acid        | 163.2     | 119       | 80    | 5  | 7         | Negative |
|                        | 163.2     | 93        | 80    | 33 | 7         | Negative |
| Ferulic acid           | 193.2     | 178       | 80    | 9  | 7         | Negative |
|                        | 193.2     | 134       | 80    | 13 | 7         | Negative |
| Sinapic acid           | 223.2     | 208       | 80    | 5  | 7         | Negative |
|                        | 223.2     | 93        | 80    | 33 | 7         | Negative |
| Cinnamic acid          | 147.2     | 103       | 80    | 5  | 7         | Negative |
|                        | 147.2     | 77        | 80    | 21 | 7         | Negative |

*Prec. Ion*: Precursor ion m/z; *Prod. Ion*: Product ion m/z; *Frag.*: Fragmentor potential (V); *CE*: Collision energy (V); *Cell Volt*: Cell acceleration voltage.
